# Supplementary material for: Deep learning application to roughness classification of road surface conditions through an e-scooter’s ride quality
Source: Frontiers journal article supplement (doi:10.3389/fbuil.2025.1497331), 2025-06-10
Supplement: Supplementary_file_1.docx [file Supplementary_file_1.docx]

**Appendix: Optimisation codes for hyperparameter tuning and K-means clustering**

| **A) Hyperparameter Tuning Using Grid Search** |
| --- |
| Different hyperparameters were used for each of the 3 different ML models (RandomForestClassifier, XGBoost and SVM with K-means clustering) depending on their unique characteristics and performance influences. The below display of code shows how the grid search was executed to find the best parameters in the RandomForestClassifier models involving hyperparameter tuning, but similar principles were used to utilize hyperparameter tuning with the other ML models.  # Hyperparameter Tuning with GridSearchCV  from sklearn.model_selection import GridSearchCV  from sklearn.ensemble import RandomForestClassifier  param_grid = {  'n_estimators': [50, 100, 150],  'max_depth': [None, 10, 20, 30],  'min_samples_split': [2, 5, 10],  'min_samples_leaf': [1, 2, 4],  'bootstrap': [True, False]  }  model = RandomForestClassifier(random_state=42)  grid_search = GridSearchCV(estimator=model, param_grid=param_grid, cv=10, n_jobs=-1, verbose=2)  grid_search.fit(X_imputed, df['Road_Surface_Type'])  # Display the best parameters  print("Best hyperparameters:", grid_search.best_params_) |
| **B) Determining Optimal Number of Clusters** |
| # Elbow and Silhouette Analysis for K-means Clustering  import matplotlib.pyplot as plt  import numpy as np  from sklearn.cluster import KMeans  from sklearn.metrics import silhouette_score  from sklearn.preprocessing import StandardScaler  # Load dataset and preprocess  file_path = 'Aggregate data for all surfaces 2.csv'  df = pd.read_csv(file_path)  features = df.select_dtypes(include=[np.number]).columns.tolist()  X = df[features].fillna(df[features].mean())  scaler = StandardScaler()  X_scaled = scaler.fit_transform(X)  # Determine the range for k values  k_range = range(2, 11)  sse = []  silhouette_scores = []  for k in k_range:  kmeans = KMeans(n_clusters=k, n_init=10, random_state=42)  kmeans.fit(X_scaled)  sse.append(kmeans.inertia_) # Sum of squared distances to closest cluster center    # Compute the mean silhouette score  silhouette_avg = silhouette_score(X_scaled, kmeans.labels_)  silhouette_scores.append(silhouette_avg)  # Plotting the results  plt.figure(figsize=(12, 6))  plt.subplot(1, 2, 1)  plt.plot(k_range, sse, marker='o')  plt.title('Elbow Method For Optimal k')  plt.xlabel('Number of clusters')  plt.ylabel('Sum of squared distances (SSE)')  plt.subplot(1, 2, 2)  plt.plot(k_range, silhouette_scores, marker='o')  plt.title('Silhouette Scores For Optimal k')  plt.xlabel('Number of clusters')  plt.ylabel('Silhouette Score')  plt |
